# Supplementary material for: RCD1 Promotes Salt Stress Tolerance in Arabidopsis by Repressing ANAC017 Activity
Source: Int J Mol Sci. 2023 Jun 6;24(12):9793. doi: 10.3390/ijms24129793 (PMC10298584; doi:10.3390/ijms24129793)
Supplement: Supplementary file 1 [file ijms-24-09793-s001.zip › Supplemental Data S1-3.xlsx]

## Sheet: SDS1
Supplemental Data Set2:The fold changes of 282 genes in mutants of int51 and int51/anac017-1 by comparing with WT
Gene name	log2FoldChange (int51 vs Col-0)	log2FoldChange(int51/anac017-1 vs Col-0)
AT1G02470	2.89391	0.883218
AT1G02520	2.47669	0.849778
AT1G02770	2.67329	1.1195
AT1G02850	1.96723	0.948118
AT1G02920	2.18215	1.12339
AT1G03660	2.58341	1.51087
AT1G04220	1.00153	-0.0777856
AT1G05060	1.792	0.480426
AT1G05680	4.24686	2.2203
AT1G06330	3.02625	1.96969
AT1G06337	1.68367	0.659183
AT1G07167	2.65357	1.01102
AT1G07173	3.13393	1.65845
AT1G09240	2.01917	0.639452
AT1G13470	3.15106	1.28376
AT1G13520	1.83069	0.827191
AT1G17180	2.22467	1.14341
AT1G20823	1.09371	-0.19548
AT1G21240	4.21302	2.52862
AT1G23550	1.26689	-0.350878
AT1G26390	3.52307	1.91374
AT1G26410	1.92182	0.825739
AT1G26970	1.19703	0.0580408
AT1G27565	8.2269	3.89828
AT1G27730	1.00928	-0.793606
AT1G30170	7.82797	6.00161
AT1G32350	8.97689	5.84821
AT1G32583	1.56753	0.38522
AT1G32870	3.84536	1.75756
AT1G32880	6.01512	2.13865
AT1G32940	1.71775	0.530179
AT1G32960	4.25609	1.72872
AT1G35230	1.85776	0.332514
AT1G36622	2.42437	0.833487
AT1G42990	1.28147	0.243123
AT1G43160	1.60337	0.323637
AT1G43605	2.33103	0.915293
AT1G44130	4.11001	2.87749
AT1G47890	2.75398	1.69071
AT1G51920	3.92223	2.26788
AT1G52110	4.83324	3.27284
AT1G55240	1.84458	0.410364
AT1G62580	1.86033	0.795482
AT1G64795	5.37752	3.4715
AT1G64900	1.25764	-0.112117
AT1G65370	2.04289	0.984984
AT1G65484	1.9642	-0.0411799
AT1G65570	1.50369	0.378658
AT1G66700	2.99945	0.585608
AT1G67030	1.04847	0.0381836
AT1G67105	1.51973	0.412423
AT1G67760	1.48705	-0.0459807
AT1G67810	2.21937	1.02394
AT1G68390	1.49761	0.425003
AT1G68620	1.62687	0.178175
AT1G69240	1.2442	0.170662
AT1G71380	1.69129	0.31581
AT1G72490	1.66828	0.464893
AT1G73000	3.3016	-0.00901433
AT1G75700	2.77865	1.60355
AT1G76240	1.14331	-0.728343
AT1G80340	1.48382	-2.92052
AT2G00370	8.12059	0.876287
AT2G01422	6.69014	3.73432
AT2G03130	7.94602	6.42128
AT2G03760	3.44247	1.3382
AT2G04050	9.66444	7.48344
AT2G04070	8.71729	5.15914
AT2G04885	4.92264	1.38477
AT2G08650	1.12805	-0.0403286
AT2G09775	3.18496	0.683041
AT2G12190	1.2075	-0.377793
AT2G13430	3.90506	2.24541
AT2G14095	1.36079	0.29012
AT2G14560	4.36819	3.24365
AT2G14610	6.06593	3.81103
AT2G15020	1.13007	-2.27855
AT2G15555	6.45845	0.937509
AT2G17040	1.28766	-0.259763
AT2G18660	4.20404	2.25602
AT2G18685	2.4298	0.356732
AT2G19190	2.1534	0.653877
AT2G19650	1.17876	-0.964171
AT2G21640	5.99956	4.37044
AT2G22590	1.75319	-0.565959
AT2G23270	5.66916	3.7571
AT2G23910	1.16988	-0.197052
AT2G24255	8.5352	7.16006
AT2G25440	3.41176	1.05121
AT2G26630	3.30218	1.05308
AT2G28815	2.67004	0.751789
AT2G29350	5.19566	2.2803
AT2G29460	1.42382	0.149707
AT2G30750	1.91235	0.744127
AT2G31230	1.50815	0.246879
AT2G31420	5.42502	3.77304
AT2G31425	5.17006	3.09511
AT2G31860	2.98004	1.34429
AT2G32020	4.11985	1.64727
AT2G32680	3.00399	1.08314
AT2G34080	1.08438	-0.188806
AT2G35480	3.07061	1.97441
AT2G35742	2.04542	0.867881
AT2G35743	1.52944	0.419481
AT2G36295	2.54314	1.39793
AT2G36750	4.43764	-0.192094
AT2G36790	1.38489	-0.460559
AT2G36792	1.38502	-0.459922
AT2G36800	3.01829	-0.906399
AT2G36970	1.5175	-0.315885
AT2G38220	3.94455	2.33922
AT2G38823	2.67672	1.2161
AT2G40750	2.47621	1.22556
AT2G41730	5.50713	2.07639
AT2G42065	9.68083	6.74
AT2G43000	2.37885	0.532492
AT2G43570	2.41573	1.10156
AT2G45130	2.92211	1.54052
AT2G47000	2.48595	1.27116
AT2G47010	1.28106	0.235378
AT2G47520	4.11679	1.25762
AT3G00700	8.50977	6.65706
AT3G00800	2.50534	1.22189
AT3G01345	8.64386	7.29302
AT3G02480	1.13333	-0.310825
AT3G02810	4.41839	2.54721
AT3G03470	1.95486	0.925105
AT3G04420	2.36971	0.922166
AT3G05245	2.25851	0.038442
AT3G06495	3.78719	1.50184
AT3G06505	2.0474	0.372796
AT3G06805	3.94106	2.5984
AT3G08590	1.4932	0.388259
AT3G09405	1.46952	0.464482
AT3G09450	1.85062	-1.89866
AT3G11080	1.33389	-0.00792385
AT3G13080	3.42419	1.87243
AT3G13090	1.521	0.468609
AT3G13950	2.19785	0.749548
AT3G18250	2.11229	1.09253
AT3G21890	1.2576	-1.22332
AT3G22370	3.31327	1.22203
AT3G22840	1.0885	-0.801153
AT3G23120	3.04187	1.24756
AT3G25250	2.24103	0.965783
AT3G25597	1.8777	0.490655
AT3G25655	3.00128	1.28862
AT3G26290	1.2059	-0.165793
AT3G27473	3.38583	0.479066
AT3G27630	2.01822	0.901343
AT3G28570	3.40249	1.30399
AT3G28580	3.00665	1.91585
AT3G29000	2.50489	0.813889
AT3G30120	2.31317	0.724496
AT3G32925	3.91627	2.45352
AT3G44006	6.36003	0
AT3G44405	4.3761	3.22405
AT3G44450	1.54252	-0.869707
AT3G46080	2.68607	0.640203
AT3G48770	1.60153	0.565442
AT3G48850	3.31784	1.65042
AT3G50770	2.1207	0.279396
AT3G50930	2.97784	0.631859
AT3G53690	2.58759	1.57979
AT3G54520	4.81958	1.96335
AT3G54530	9.53202	5.99104
AT3G56710	1.7426	0.330057
AT3G57157	1.2079	0.0232933
AT3G57260	3.85884	1.93371
AT3G58150	5.12747	1.87858
AT3G60140	2.81896	1.07366
AT3G62260	1.16373	0.0936977
AT3G63380	1.72795	0.666684
AT4G02795	4.74045	1.5791
AT4G04490	3.45645	1.04078
AT4G05018	3.37974	0.331269
AT4G06410	2.21526	0.69597
AT4G07010	5.98207	3.75641
AT4G08555	4.14585	1.44763
AT4G09215	3.57192	2.09484
AT4G10500	2.02189	0.0467553
AT4G12290	2.14687	0.7017
AT4G12380	2.45088	1.23554
AT4G12382	2.66333	1.60604
AT4G12470	1.71731	0.223449
AT4G12490	1.33914	0.160582
AT4G12495	1.23018	0.043216
AT4G12735	9.46085	5.91531
AT4G13577	1.59986	0.229293
AT4G13900	1.99173	0.134752
AT4G14630	1.5247	0.474547
AT4G15480	1.08241	-0.556272
AT4G16670	2.03524	0.619485
AT4G16680	1.69443	0.446845
AT4G17670	1.28538	0.24734
AT4G19810	1.39731	0.383908
AT4G19975	1.42926	-0.13454
AT4G20000	1.25706	0.170232
AT4G21490	7.44674	4.69584
AT4G22960	2.76433	1.49646
AT4G23240	1.45385	0.448893
AT4G23320	2.64124	-0.0452565
AT4G23450	1.10127	0.0717558
AT4G27580	5.61638	2.12522
AT4G27585	1.68314	0.567442
AT4G28530	1.40869	0.384824
AT4G29110	2.01957	0.212144
AT4G33040	1.7251	-0.469729
AT4G37022	1.94716	0.826274
AT4G37030	3.33398	1.61766
AT4G37370	4.19757	2.07887
AT4G37900	1.42813	-0.038958
AT5G00570	4.32198	3.30772
AT5G01550	2.49231	0.30925
AT5G01790	1.07004	-1.4089
AT5G03090	3.58927	1.46374
AT5G03975	2.72003	1.398
AT5G05340	2.42614	0.498306
AT5G05995	1.43953	-0.2611
AT5G06195	3.12206	1.87633
AT5G09570	6.54855	2.95164
AT5G10760	1.82711	0.695868
AT5G11410	2.21041	0.990777
AT5G13210	5.88841	4.71859
AT5G14490	6.25518	4.48036
AT5G14730	1.97107	0.479267
AT5G15360	4.62837	3.34368
AT5G15950	1.39356	-0.875269
AT5G16570	1.83908	0.445235
AT5G16770	1.66359	0.640464
AT5G17040	1.14094	-0.220074
AT5G17860	2.09961	0.944515
AT5G20790	1.60826	-0.23197
AT5G23115	4.47739	2.70815
AT5G23235	1.85989	0.627295
AT5G23240	1.58076	0.439253
AT5G24240	1.7682	0.332386
AT5G24640	8.69419	4.35454
AT5G26270	3.17057	0.368743
AT5G26970	5.60775	-0.0854993
AT5G27940	3.70447	2.41863
AT5G33390	3.40001	2.30264
AT5G33395	3.37144	1.41297
AT5G34800	1.76435	0.591913
AT5G37490	7.74815	6.20524
AT5G38565	2.15737	0.688825
AT5G38900	2.3567	1.06656
AT5G39110	4.42799	2.63548
AT5G39670	1.37395	-0.211774
AT5G40010	2.00066	0.010994
AT5G40690	2.08893	0.965841
AT5G42830	2.55027	0.742724
AT5G43450	2.48694	0.376927
AT5G44390	1.54974	0.182389
AT5G44567	4.02555	2.6176
AT5G45095	2.36574	1.14071
AT5G45990	2.78597	1.18567
AT5G48400	1.89198	0.513643
AT5G48657	1.17007	0.107451
AT5G49480	1.26338	-0.0497569
AT5G51440	4.74042	2.98991
AT5G52750	1.91612	0.405962
AT5G52760	2.51906	1.04495
AT5G52930	5.09951	1.57138
AT5G52940	5.24516	1.23482
AT5G53230	5.52069	3.95388
AT5G53240	6.24889	4.35746
AT5G54450	6.0679	-0.0854966
AT5G54470	1.59595	-0.369639
AT5G54550	6.4541	4.14045
AT5G54560	8.4392	5.36446
AT5G54610	1.95171	0.722811
AT5G55620	2.22337	0.0165692
AT5G58390	1.03459	-0.0636942
AT5G58400	3.08297	1.87437
AT5G59820	1.63551	0.544172
AT5G60900	1.52785	0.28258
AT5G61490	1.98466	0.979125
AT5G61495	2.62502	1.54978
AT5G62480	3.86174	1.3836
AT5G63130	1.19164	-0.696603
AT5G64685	1.69381	0.577407

## Sheet: SDS2
Supplemental Data Set2. The detailed information of MDM location in the promoter of candidate target genes of ANAC017
motif_alt_id	sequence_name	start	stop	strand	score	p-value	q-value	matched_sequence		Gene description
CTTGNNNNNCA(A/C)G	AT1G02520	1775	1787	+	14.1697	2.24e-05	0.15	CTTGCTTCTCAAG		An ATP-binding cassette (ABC) transporter.
CTTGNNNNNCA(A/C)G	AT1G02520	1775	1787	-	14.1697	2.24e-05	0.15	CTTGAGAAGCAAG
CTTGNNNNNCA(A/C)G	AT1G03660	1964	1976	+	14.6788	6.86e-06	0.15	CTTGCTCGGCAAG		Ankyrin-repeat containing protein
CTTGNNNNNCA(A/C)G	AT1G03660	1964	1976	-	14.6788	6.86e-06	0.15	CTTGCCGAGCAAG
CTTGNNNNNCA(A/C)G	AT1G05060	1851	1863	+	14.1697	2.24e-05	0.15	CTTGATCTCCAAG		Coiled-coil protein
CTTGNNNNNCA(A/C)G	AT1G05060	1851	1863	-	14.1697	2.24e-05	0.15	CTTGGAGATCAAG
CTTGNNNNNCA(A/C)G	AT1G05680	1816	1828	+	14.9455	1.59e-06	0.15	CTTGGTCGCCACG		UGT74E2 (Uridine diphosphate glycosyltransferase 74E2)
CTTGNNNNNCA(A/C)G	AT1G06330	930	942	-	14.6909	5.2e-06	0.15	CTTGGCAGTCACG		Heavy metal associated protein 2
CTTGNNNNNCA(A/C)G	AT1G06330	1868	1880	+	14.1697	2.24e-05	0.15	CTTGAAGAGCAAG
CTTGNNNNNCA(A/C)G	AT1G06330	1868	1880	-	14.1697	2.24e-05	0.15	CTTGCTCTTCAAG
CTTGNNNNNCA(A/C)G	AT1G07167	1367	1379	+	14.6909	5.2e-06	0.15	CTTGGACCACACG
CTTGNNNNNCA(A/C)G	AT1G07173	144	156	+	14.6909	5.2e-06	0.15	CTTGGACCACACG
CTTGNNNNNCA(A/C)G	AT1G13470	426	438	+	14.4242	1.5e-05	0.15	CTTGAGGGACAAG
CTTGNNNNNCA(A/C)G	AT1G13470	426	438	-	14.4242	1.5e-05	0.15	CTTGTCCCTCAAG
CTTGNNNNNCA(A/C)G	AT1G23550	1787	1799	+	14.4242	1.5e-05	0.15	CTTGTCGTGCAAG		SIMILAR TO RCD ONE 2, SRO2
CTTGNNNNNCA(A/C)G	AT1G23550	1787	1799	-	14.4242	1.5e-05	0.15	CTTGCACGACAAG
CTTGNNNNNCA(A/C)G	AT1G23550	973	985	+	13.9152	2.6e-05	0.158	CTTGAGAAACAAG
CTTGNNNNNCA(A/C)G	AT1G23550	973	985	-	13.9152	2.6e-05	0.158	CTTGTTTCTCAAG
CTTGNNNNNCA(A/C)G	AT1G27565	1872	1884	+	14.1697	2.24e-05	0.15	CTTGCAAACCAAG
CTTGNNNNNCA(A/C)G	AT1G27565	1872	1884	-	14.1697	2.24e-05	0.15	CTTGGTTTGCAAG
CTTGNNNNNCA(A/C)G	AT1G30170	1907	1919	+	14.4364	1.09e-05	0.15	CTTGCTATCCACG		ATDOA4, DUF295 ORGANELLAR A 4
CTTGNNNNNCA(A/C)G	AT1G32960	1041	1053	+	14.1697	2.24e-05	0.15	CTTGGGATTCAAG		ATSBT3.3, SBT3.3
CTTGNNNNNCA(A/C)G	AT1G32960	1041	1053	-	14.1697	2.24e-05	0.15	CTTGAATCCCAAG
CTTGNNNNNCA(A/C)G	AT1G36622	351	363	+	14.4242	1.5e-05	0.15	CTTGCGCTTCAAG
CTTGNNNNNCA(A/C)G	AT1G36622	351	363	-	14.4242	1.5e-05	0.15	CTTGAAGCGCAAG
CTTGNNNNNCA(A/C)G	AT1G47890	1326	1338	+	14.4242	1.5e-05	0.15	CTTGGAACCCAAG		ATRLP7, RECEPTOR LIKE PROTEIN 7, RLP7
CTTGNNNNNCA(A/C)G	AT1G47890	1326	1338	-	14.4242	1.5e-05	0.15	CTTGGGTTCCAAG
CTTGNNNNNCA(A/C)G	AT1G55240	499	511	+	14.1697	2.24e-05	0.15	CTTGATTCCCAAG		PROTEINASE INHIBITOR I4, SERPIN (DUF716)
CTTGNNNNNCA(A/C)G	AT1G55240	499	511	-	14.1697	2.24e-05	0.15	CTTGGGAATCAAG
CTTGNNNNNCA(A/C)G	AT1G64900	1868	1880	+	14.4364	1.09e-05	0.15	CTTGAATGGCACG		CYP89A2, CYTOCHROME P450, FAMILY 89, SUBFAMILY A, POLYPEPTIDE 2
CTTGNNNNNCA(A/C)G	AT1G69240	1786	1798	-	14.4364	1.09e-05	0.15	CTTGAGACTCACG		ATMES15, MES15, METHYL ESTERASE 15, RHS9, ROOT HAIR SPECIFIC 9
CTTGNNNNNCA(A/C)G	AT1G71380	920	932	+	13.9152	2.6e-05	0.158	CTTGTTTAGCAAG		GLYCOSYL HYDROLASE 9B3, ATCEL3, ATGH9B3, CEL3, CELLULASE 3
CTTGNNNNNCA(A/C)G	AT1G71380	920	932	-	13.9152	2.6e-05	0.158	CTTGCTAAACAAG
CTTGNNNNNCA(A/C)G	AT2G00370	189	201	-	14.6909	5.2e-06	0.15	CTTGCAGCACACG
CTTGNNNNNCA(A/C)G	AT2G00370	1818	1830	+	14.6788	6.86e-06	0.15	CTTGGGGACCAAG
CTTGNNNNNCA(A/C)G	AT2G00370	1818	1830	-	14.6788	6.86e-06	0.15	CTTGGTCCCCAAG
CTTGNNNNNCA(A/C)G	AT2G00370	563	575	+	14.1697	2.24e-05	0.15	CTTGACCAACAAG
CTTGNNNNNCA(A/C)G	AT2G00370	563	575	-	14.1697	2.24e-05	0.15	CTTGTTGGTCAAG
CTTGNNNNNCA(A/C)G	AT2G00370	1877	1889	+	14.1697	2.24e-05	0.15	CTTGGGAATCAAG
CTTGNNNNNCA(A/C)G	AT2G00370	1877	1889	-	14.1697	2.24e-05	0.15	CTTGATTCCCAAG
CTTGNNNNNCA(A/C)G	AT2G03130	1832	1844	+	14.4242	1.5e-05	0.15	CTTGGAGAGCAAG		Ribosomal protein L12
CTTGNNNNNCA(A/C)G	AT2G03130	1832	1844	-	14.4242	1.5e-05	0.15	CTTGCTCTCCAAG
CTTGNNNNNCA(A/C)G	AT2G03760	1800	1812	-	14.4364	1.09e-05	0.15	CTTGAAGAGCACG		SOT12 (Sulphotransferase 12)
CTTGNNNNNCA(A/C)G	AT2G04050	1648	1660	+	14.6788	6.86e-06	0.15	CTTGGTCCCCAAG		MATE efflux family protein
CTTGNNNNNCA(A/C)G	AT2G04050	1648	1660	-	14.6788	6.86e-06	0.15	CTTGGGGACCAAG
CTTGNNNNNCA(A/C)G	AT2G04050	1589	1601	+	14.1697	2.24e-05	0.15	CTTGATTCCCAAG
CTTGNNNNNCA(A/C)G	AT2G04050	1589	1601	-	14.1697	2.24e-05	0.15	CTTGGGAATCAAG
CTTGNNNNNCA(A/C)G	AT2G04070	1314	1326	-	14.6909	5.2e-06	0.15	CTTGGGGATCACG
CTTGNNNNNCA(A/C)G	AT2G04070	1256	1268	+	14.1697	2.24e-05	0.15	CTTGATTCCCAAG
CTTGNNNNNCA(A/C)G	AT2G04070	1256	1268	-	14.1697	2.24e-05	0.15	CTTGGGAATCAAG
CTTGNNNNNCA(A/C)G	AT2G21640	1821	1833	+	14.4242	1.5e-05	0.15	CTTGCTCTCCAAG		Marker for oxidative stress response protein
CTTGNNNNNCA(A/C)G	AT2G21640	1821	1833	-	14.4242	1.5e-05	0.15	CTTGGAGAGCAAG
CTTGNNNNNCA(A/C)G	AT2G23270	1199	1211	-	14.1818	1.74e-05	0.15	CTTGTTTCTCACG		PAMP-INDUCED SECRETED PEPTIDE 3, PIP3, PRECURSOR OF PAMP-INDUCED PEPTIDE 3, PREPIP3
CTTGNNNNNCA(A/C)G	AT2G24255	1835	1847	+	14.6788	6.86e-06	0.15	CTTGGGCTCCAAG		ATFDA15, F-BOX/DUF295 ANCESTRAL 15
CTTGNNNNNCA(A/C)G	AT2G24255	1835	1847	-	14.6788	6.86e-06	0.15	CTTGGAGCCCAAG
CTTGNNNNNCA(A/C)G	AT2G28815	1964	1976	+	14.4242	1.5e-05	0.15	CTTGAGCAGCAAG		50S ribosomal protein L16
CTTGNNNNNCA(A/C)G	AT2G28815	1964	1976	-	14.4242	1.5e-05	0.15	CTTGCTGCTCAAG
CTTGNNNNNCA(A/C)G	AT2G31425	584	596	+	14.4242	1.5e-05	0.15	CTTGGGTCTCAAG
CTTGNNNNNCA(A/C)G	AT2G31425	584	596	-	14.4242	1.5e-05	0.15	CTTGAGACCCAAG
CTTGNNNNNCA(A/C)G	AT2G31860	1888	1900	+	14.1697	2.24e-05	0.15	CTTGATCTCCAAG		Pseudogene of poly(ADP-ribose) glycohydrolase 2
CTTGNNNNNCA(A/C)G	AT2G31860	1888	1900	-	14.1697	2.24e-05	0.15	CTTGGAGATCAAG
CTTGNNNNNCA(A/C)G	AT2G34080	1078	1090	+	13.9152	2.6e-05	0.158	CTTGTAAGTCAAG
CTTGNNNNNCA(A/C)G	AT2G34080	1078	1090	-	13.9152	2.6e-05	0.158	CTTGACTTACAAG
CTTGNNNNNCA(A/C)G	AT2G35480	1789	1801	+	14.1697	2.24e-05	0.15	CTTGACGAACAAG		Envelope glycoprotein
CTTGNNNNNCA(A/C)G	AT2G35480	1789	1801	-	14.1697	2.24e-05	0.15	CTTGTTCGTCAAG
CTTGNNNNNCA(A/C)G	AT2G36750	240	252	+	14.1697	2.24e-05	0.15	CTTGTGCAACAAG		UGT73C1(Uridine diphosphate glucosyltransferase 73C1)
CTTGNNNNNCA(A/C)G	AT2G36750	240	252	-	14.1697	2.24e-05	0.15	CTTGTTGCACAAG
CTTGNNNNNCA(A/C)G	AT2G36790	1905	1917	+	14.6909	5.2e-06	0.15	CTTGCTCTCCACG		UDP-GLUCOSYL TRANSFERASE 73C6, UGT73C6
CTTGNNNNNCA(A/C)G	AT2G36792	268	280	+	13.9152	2.6e-05	0.158	CTTGTTACACAAG
CTTGNNNNNCA(A/C)G	AT2G36792	268	280	-	13.9152	2.6e-05	0.158	CTTGTGTAACAAG
CTTGNNNNNCA(A/C)G	AT2G38823	1815	1827	-	14.9455	1.59e-06	0.15	CTTGCTCCCCACG
CTTGNNNNNCA(A/C)G	AT2G41730	1875	1887	+	14.4242	1.5e-05	0.15	CTTGCTGGACAAG		HRG1 (H2O2 response gene 1)
CTTGNNNNNCA(A/C)G	AT2G41730	1875	1887	-	14.4242	1.5e-05	0.15	CTTGTCCAGCAAG
CTTGNNNNNCA(A/C)G	AT2G42065	1812	1824	+	14.4242	1.5e-05	0.15	CTTGGAGACCAAG
CTTGNNNNNCA(A/C)G	AT2G42065	1812	1824	-	14.4242	1.5e-05	0.15	CTTGGTCTCCAAG
CTTGNNNNNCA(A/C)G	AT2G47000	805	817	+	14.4242	1.5e-05	0.15	CTTGTTCCCCAAG		Encodes an auxin efflux transmembrane transporter
CTTGNNNNNCA(A/C)G	AT2G47000	805	817	-	14.4242	1.5e-05	0.15	CTTGGGGAACAAG
CTTGNNNNNCA(A/C)G	AT2G47000	2043	2055	+	14.1697	2.24e-05	0.15	CTTGTTCGTCAAG
CTTGNNNNNCA(A/C)G	AT2G47000	2043	2055	-	14.1697	2.24e-05	0.15	CTTGACGAACAAG
CTTGNNNNNCA(A/C)G	AT2G47010	1402	1414	+	14.4242	1.5e-05	0.15	CTTGGGGAACAAG		Calcium/calcium/calmodulin-dependent Serine/Threonine-kinase
CTTGNNNNNCA(A/C)G	AT2G47010	1402	1414	-	14.4242	1.5e-05	0.15	CTTGTTCCCCAAG
CTTGNNNNNCA(A/C)G	AT2G47010	164	176	+	14.1697	2.24e-05	0.15	CTTGACGAACAAG
CTTGNNNNNCA(A/C)G	AT2G47010	164	176	-	14.1697	2.24e-05	0.15	CTTGTTCGTCAAG
CTTGNNNNNCA(A/C)G	AT2G47520	1848	1860	+	14.4242	1.5e-05	0.15	CTTGGTCGTCAAG		ERF71 (Ethylene response factor 71)
CTTGNNNNNCA(A/C)G	AT2G47520	1848	1860	-	14.4242	1.5e-05	0.15	CTTGACGACCAAG
CTTGNNNNNCA(A/C)G	AT3G00700	1927	1939	+	14.4242	1.5e-05	0.15	CTTGCTCTCCAAG
CTTGNNNNNCA(A/C)G	AT3G00700	1927	1939	-	14.4242	1.5e-05	0.15	CTTGGAGAGCAAG
CTTGNNNNNCA(A/C)G	AT3G00700	1077	1089	+	14.1697	2.24e-05	0.15	CTTGTACCACAAG
CTTGNNNNNCA(A/C)G	AT3G00700	1077	1089	-	14.1697	2.24e-05	0.15	CTTGTGGTACAAG
CTTGNNNNNCA(A/C)G	AT3G00800	1647	1659	+	14.6788	6.86e-06	0.15	CTTGCTCCGCAAG
CTTGNNNNNCA(A/C)G	AT3G00800	1647	1659	-	14.6788	6.86e-06	0.15	CTTGCGGAGCAAG
CTTGNNNNNCA(A/C)G	AT3G00800	641	653	+	14.4242	1.5e-05	0.15	CTTGGCCTACAAG
CTTGNNNNNCA(A/C)G	AT3G00800	641	653	-	14.4242	1.5e-05	0.15	CTTGTAGGCCAAG
CTTGNNNNNCA(A/C)G	AT3G06505	770	782	+	14.4242	1.5e-05	0.15	CTTGTGCTGCAAG
CTTGNNNNNCA(A/C)G	AT3G06505	770	782	-	14.4242	1.5e-05	0.15	CTTGCAGCACAAG
CTTGNNNNNCA(A/C)G	AT3G06505	703	715	+	14.1697	2.24e-05	0.15	CTTGTTGGACAAG
CTTGNNNNNCA(A/C)G	AT3G06505	703	715	-	14.1697	2.24e-05	0.15	CTTGTCCAACAAG
CTTGNNNNNCA(A/C)G	AT3G13080	2324	2336	-	14.6909	5.2e-06	0.15	CTTGGAGAGCACG		Encodes an ATP-dependent MRP-like ABC transporter
CTTGNNNNNCA(A/C)G	AT3G22370	1630	1642	+	14.9455	1.59e-06	0.15	CTTGGCGACCACG		AOX1a (Alternative oxidase 1a)
CTTGNNNNNCA(A/C)G	AT3G22370	1657	1669	+	14.4242	1.5e-05	0.15	CTTGCTCTCCAAG
CTTGNNNNNCA(A/C)G	AT3G22370	1657	1669	-	14.4242	1.5e-05	0.15	CTTGGAGAGCAAG
CTTGNNNNNCA(A/C)G	AT3G28570	1156	1168	+	14.4242	1.5e-05	0.15	CTTGTCCCACAAG
CTTGNNNNNCA(A/C)G	AT3G28570	1156	1168	-	14.4242	1.5e-05	0.15	CTTGTGGGACAAG
CTTGNNNNNCA(A/C)G	AT3G28570	1679	1691	+	13.9152	2.6e-05	0.158	CTTGGTTATCAAG
CTTGNNNNNCA(A/C)G	AT3G28570	1679	1691	-	13.9152	2.6e-05	0.158	CTTGATAACCAAG
CTTGNNNNNCA(A/C)G	AT3G28580	1643	1655	+	13.9152	2.6e-05	0.158	CTTGACTAACAAG
CTTGNNNNNCA(A/C)G	AT3G28580	1643	1655	-	13.9152	2.6e-05	0.158	CTTGTTAGTCAAG
CTTGNNNNNCA(A/C)G	AT3G48850	34	46	+	14.1697	2.24e-05	0.15	CTTGACTACCAAG		MITOCHONDRIAL PHOSPHATE TRANSPORTER 2, MPT2
CTTGNNNNNCA(A/C)G	AT3G48850	34	46	-	14.1697	2.24e-05	0.15	CTTGGTAGTCAAG
CTTGNNNNNCA(A/C)G	AT3G57260	26	38	+	14.1697	2.24e-05	0.15	CTTGGTAAGCAAG		BETA-1,3-GLUCANASE 2, BG2
CTTGNNNNNCA(A/C)G	AT3G57260	26	38	-	14.1697	2.24e-05	0.15	CTTGCTTACCAAG
CTTGNNNNNCA(A/C)G	AT3G57260	1330	1342	-	13.9273	2.3e-05	0.153	CTTGTAAAACACG
CTTGNNNNNCA(A/C)G	AT3G58150	1914	1926	+	14.6788	6.86e-06	0.15	CTTGCACGGCAAG		OPA3 (Optic atrophy 3 protein)
CTTGNNNNNCA(A/C)G	AT3G58150	1914	1926	-	14.6788	6.86e-06	0.15	CTTGCCGTGCAAG
CTTGNNNNNCA(A/C)G	AT3G62260	1330	1342	+	14.6788	6.86e-06	0.15	CTTGGGAGGCAAG		PP2C49, TYPE 2C PROTEIN PHOSPHATASE 49
CTTGNNNNNCA(A/C)G	AT3G62260	1330	1342	-	14.6788	6.86e-06	0.15	CTTGCCTCCCAAG
CTTGNNNNNCA(A/C)G	AT4G06410	311	323	+	14.1697	2.24e-05	0.15	CTTGGGATTCAAG
CTTGNNNNNCA(A/C)G	AT4G06410	311	323	-	14.1697	2.24e-05	0.15	CTTGAATCCCAAG
CTTGNNNNNCA(A/C)G	AT4G08555	1741	1753	+	14.1697	2.24e-05	0.15	CTTGGTTTCCAAG
CTTGNNNNNCA(A/C)G	AT4G08555	1741	1753	-	14.1697	2.24e-05	0.15	CTTGGAAACCAAG
CTTGNNNNNCA(A/C)G	AT4G09215	1897	1909	+	14.6788	6.86e-06	0.15	CTTGGCCAGCAAG
CTTGNNNNNCA(A/C)G	AT4G09215	1897	1909	-	14.6788	6.86e-06	0.15	CTTGCTGGCCAAG
CTTGNNNNNCA(A/C)G	AT4G12382	318	330	+	14.4242	1.5e-05	0.15	CTTGACGGTCAAG
CTTGNNNNNCA(A/C)G	AT4G12382	318	330	-	14.4242	1.5e-05	0.15	CTTGACCGTCAAG
CTTGNNNNNCA(A/C)G	AT4G12735	1844	1856	-	14.9333	1.87e-06	0.15	CTTGGCGGCCAAG		Encodes a peroxisomal protein
CTTGNNNNNCA(A/C)G	AT4G12735	1844	1856	+	14.9333	1.87e-06	0.15	CTTGGCCGCCAAG
CTTGNNNNNCA(A/C)G	AT4G12735	1772	1784	+	14.1818	1.74e-05	0.15	CTTGAACTTCACG
CTTGNNNNNCA(A/C)G	AT4G13900	928	940	-	14.4364	1.09e-05	0.15	CTTGTTAGCCACG
CTTGNNNNNCA(A/C)G	AT4G13900	1922	1934	-	14.1818	1.74e-05	0.15	CTTGTCTTACACG
CTTGNNNNNCA(A/C)G	AT4G16680	1768	1780	+	14.1818	1.74e-05	0.15	CTTGCTTATCACG
CTTGNNNNNCA(A/C)G	AT4G19810	1629	1641	+	13.9152	2.6e-05	0.158	CTTGTTAGACAAG
CTTGNNNNNCA(A/C)G	AT4G19810	1629	1641	-	13.9152	2.6e-05	0.158	CTTGTCTAACAAG
CTTGNNNNNCA(A/C)G	AT4G21490	1696	1708	-	14.9455	1.59e-06	0.15	CTTGACGGCCACG		NAD(P)H dehydrogenase B3
CTTGNNNNNCA(A/C)G	AT4G37030	1904	1916	+	14.4364	1.09e-05	0.15	CTTGGACAACACG
CTTGNNNNNCA(A/C)G	AT4G37370	1797	1809	+	14.1697	2.24e-05	0.15	CTTGAGGAACAAG		CYP81D8 (cytochrome p450, family 81, subfamily D, polypeptide 8)
CTTGNNNNNCA(A/C)G	AT4G37370	1797	1809	-	14.1697	2.24e-05	0.15	CTTGTTCCTCAAG
CTTGNNNNNCA(A/C)G	AT5G09570	1780	1792	-	14.9455	1.59e-06	0.15	CTTGCCCGTCACG		AT12Cys-2 (encode cysteine protein in mitochondria)
CTTGNNNNNCA(A/C)G	AT5G09570	54	66	+	14.1697	2.24e-05	0.15	CTTGTAACCCAAG
CTTGNNNNNCA(A/C)G	AT5G09570	54	66	-	14.1697	2.24e-05	0.15	CTTGGGTTACAAG
CTTGNNNNNCA(A/C)G	AT5G09570	736	748	+	14.1697	2.24e-05	0.15	CTTGATGGACAAG
CTTGNNNNNCA(A/C)G	AT5G09570	736	748	-	14.1697	2.24e-05	0.15	CTTGTCCATCAAG
CTTGNNNNNCA(A/C)G	AT5G11410	1187	1199	+	14.1697	2.24e-05	0.15	CTTGGGAAACAAG		BKN2, BRASSIKIN2, SUPPRESSOR OF ZED1-D2, SZE2
CTTGNNNNNCA(A/C)G	AT5G11410	1187	1199	-	14.1697	2.24e-05	0.15	CTTGTTTCCCAAG
CTTGNNNNNCA(A/C)G	AT5G13210	1751	1763	+	14.4242	1.5e-05	0.15	CTTGATCCCCAAG
CTTGNNNNNCA(A/C)G	AT5G13210	1751	1763	-	14.4242	1.5e-05	0.15	CTTGGGGATCAAG
CTTGNNNNNCA(A/C)G	AT5G14490	568	580	+	14.1697	2.24e-05	0.15	CTTGACAACCAAG		NAC domain containing protein 85
CTTGNNNNNCA(A/C)G	AT5G14490	568	580	-	14.1697	2.24e-05	0.15	CTTGGTTGTCAAG
CTTGNNNNNCA(A/C)G	AT5G14490	809	821	+	14.1697	2.24e-05	0.15	CTTGGTGATCAAG
CTTGNNNNNCA(A/C)G	AT5G14490	809	821	-	14.1697	2.24e-05	0.15	CTTGATCACCAAG
CTTGNNNNNCA(A/C)G	AT5G14730	1822	1834	+	14.4242	1.5e-05	0.15	CTTGCTGCACAAG
CTTGNNNNNCA(A/C)G	AT5G14730	1822	1834	-	14.4242	1.5e-05	0.15	CTTGTGCAGCAAG
CTTGNNNNNCA(A/C)G	AT5G14730	1273	1285	+	13.9152	2.6e-05	0.158	CTTGTCAATCAAG
CTTGNNNNNCA(A/C)G	AT5G14730	1273	1285	-	13.9152	2.6e-05	0.158	CTTGATTGACAAG
CTTGNNNNNCA(A/C)G	AT5G23115	974	986	-	14.4364	1.09e-05	0.15	CTTGGAATCCACG
CTTGNNNNNCA(A/C)G	AT5G24640	1870	1882	+	14.4242	1.5e-05	0.15	CTTGGTGGACAAG		HRG2 (H2O2 response gene)
CTTGNNNNNCA(A/C)G	AT5G24640	1870	1882	-	14.4242	1.5e-05	0.15	CTTGTCCACCAAG
CTTGNNNNNCA(A/C)G	AT5G38900	1895	1907	+	14.1697	2.24e-05	0.15	CTTGAAGGTCAAG		PDI, PROTEIN DISULFIDE ISOMERASE
CTTGNNNNNCA(A/C)G	AT5G38900	1895	1907	-	14.1697	2.24e-05	0.15	CTTGACCTTCAAG
CTTGNNNNNCA(A/C)G	AT5G40690	1881	1893	+	14.6788	6.86e-06	0.15	CTTGTCCCGCAAG		Histone-lysine N-methyltransferase trithorax-like protein
CTTGNNNNNCA(A/C)G	AT5G40690	1881	1893	-	14.6788	6.86e-06	0.15	CTTGCGGGACAAG
CTTGNNNNNCA(A/C)G	AT5G40690	154	166	+	14.4242	1.5e-05	0.15	CTTGCACCTCAAG
CTTGNNNNNCA(A/C)G	AT5G40690	154	166	-	14.4242	1.5e-05	0.15	CTTGAGGTGCAAG
CTTGNNNNNCA(A/C)G	AT5G51440	1813	1825	+	14.6909	5.2e-06	0.15	CTTGGAGACCACG		HSP23.5 (HSP20-like chaperones superfamily protein)
CTTGNNNNNCA(A/C)G	AT5G52930	1875	1887	+	14.9455	1.59e-06	0.15	CTTGGTGGGCACG		ATDOB4, DUF295 ORGANELLAR B 4
CTTGNNNNNCA(A/C)G	AT5G52940	1846	1858	+	14.6788	6.86e-06	0.15	CTTGGTGGGCAAG		ATDOB5, DUF295 ORGANELLAR B 5
CTTGNNNNNCA(A/C)G	AT5G52940	1846	1858	-	14.6788	6.86e-06	0.15	CTTGCCCACCAAG
CTTGNNNNNCA(A/C)G	AT5G52940	783	795	-	14.4364	1.09e-05	0.15	CTTGTGCAACACG
CTTGNNNNNCA(A/C)G	AT5G53230	1862	1874	+	14.6788	6.86e-06	0.15	CTTGGTGGGCAAG		ATDOB6, DUF295 ORGANELLAR B 6
CTTGNNNNNCA(A/C)G	AT5G53230	1862	1874	-	14.6788	6.86e-06	0.15	CTTGCCCACCAAG
CTTGNNNNNCA(A/C)G	AT5G53240	1874	1886	+	14.6788	6.86e-06	0.15	CTTGGTGGGCAAG		ATDOB7, DUF295 ORGANELLAR B 7
CTTGNNNNNCA(A/C)G	AT5G53240	1874	1886	-	14.6788	6.86e-06	0.15	CTTGCCCACCAAG
CTTGNNNNNCA(A/C)G	AT5G54450	1884	1896	+	14.6788	6.86e-06	0.15	CTTGGCGGACAAG		ATDOB11, DUF295 ORGANELLAR B 11
CTTGNNNNNCA(A/C)G	AT5G54450	1884	1896	-	14.6788	6.86e-06	0.15	CTTGTCCGCCAAG
CTTGNNNNNCA(A/C)G	AT5G54550	1907	1919	+	14.6788	6.86e-06	0.15	CTTGGTGGGCAAG
CTTGNNNNNCA(A/C)G	AT5G54550	1907	1919	-	14.6788	6.86e-06	0.15	CTTGCCCACCAAG
CTTGNNNNNCA(A/C)G	AT5G54560	1906	1918	+	14.6788	6.86e-06	0.15	CTTGGTGGGCAAG		ATDOB13, DUF295 ORGANELLAR B 13
CTTGNNNNNCA(A/C)G	AT5G54560	1906	1918	-	14.6788	6.86e-06	0.15	CTTGCCCACCAAG
CTTGNNNNNCA(A/C)G	AT5G55620	430	442	+	14.4242	1.5e-05	0.15	CTTGCACACCAAG
CTTGNNNNNCA(A/C)G	AT5G55620	430	442	-	14.4242	1.5e-05	0.15	CTTGGTGTGCAAG		RESPONSIVE TO HIGH LIGHT 41, RHL41, ZAT12
CTTGNNNNNCA(A/C)G	AT5G59820	878	890	+	14.6909	5.2e-06	0.15	CTTGCTTCCCACG		Glutathione S-transferase tau 9
CTTGNNNNNCA(A/C)G	AT5G62480	525	537	+	14.9455	1.59e-06	0.15	CTTGGCTGGCACG
CTTGNNNNNCA(A/C)G	AT5G62480	810	822	+	14.1697	2.24e-05	0.15	CTTGGACTACAAG
CTTGNNNNNCA(A/C)G	AT5G62480	810	822	-	14.1697	2.24e-05	0.15	CTTGTAGTCCAAG
# FIMO (Find Individual Motif Occurrences): Version 5.4.1
# The format of this file is described at https://meme-suite.org/meme/doc/fimo-output-format.html.

## Sheet: SDS3
Supplemental Data Set3: Primers used in this study.
Type	Name	Sequence (5′ → 3′)
Genotyping primers	int51-F	GCTTCTTCGTGGTGATAAAGC
	int51-R	AATATATGTGTGTTCATATTGAAGCT
	anac017-1-LP	TGTTACGTAGATGGCGGATTC
	anac017-1-RP	TTCTCAGTTGAAGAAGCTCCG
	anac017-2-LP	CTCTTTCCTCAGTGGCAACAG
	anac017-2-RP	CAGGGAACTTCTGCAAATCTG
	SALK022172-F2	CCAGCGTGGACCGCTTGCTGC
	SALK044777-R2	GCTGTTGCCCGTCTCACTGG
Vector construction primers	p35S::eGFP-ANAC017-F	GTACCGCGGGCCCGGGATCCATGGCGGATTCTTCACCCGAT
	p35S::eGFP-ANAC017-R	TATCTAGATCCGGTGGATCCGTCTTTCAAGAGAAGACTTCTACCTGAG
	pGD-RCD1-eGFP-F	CTCTCTACAAGATCTATGGAAGCCAAGATCGTCAAGGTG
	pGD-RCD1-eGFP-R	CAGAATTCGAAGCTTGCAATCCACCTGCACCTTCTTCATG
	pGD-eGFP-ANAC017-F	TCGAATTCTGCAGTCGACATGGCGGATTCTTCACCCGAT
	pGD-eGFP-ANAC017-R	AGATCCGGTGGATCCGTCTTTCAAGAGAAGACTTCTACCTGAG
	p35S::RCD1-N-VENUS -F	ACTAGTGGATCCATCGAT ATGGAAGCCAAGATCGTCAAGGTG
	p35S::RCD1-N-VENUS -R	GGGAGCGGTACCCTCGAG CAATCCACCTGCACCTTCTTCATG
	p35S:: ANAC017ΔTM -C-VENUS-F	ACTAGTGGATCCATCGATATGGCGGATTCTTCACCCGAT
	p35S:: ANAC017ΔTM -C-VENUS-R	GGGAGCGGTACCCTCGAGTCTGTTTCTAATACCCTTCTTTGCTATG
	pSK-RCD1-F	CGCGGTGGCGGCCGCTCTAGAATGGAAGCCAAGATCGTCAAGGTG
	pSK-RCD1-R	CTGCAGCCCGGGGGATCC TTACAATCCACCTGCACCTTCTTCATG
	pSK- ANAC017ΔTM -F	GAGGACAGCCCAAGCTGAGCTCATGGCGGATTCTTCACCCGAT
	pSK- ANAC017ΔTM -R	TTCAGCGTACCGAATTGGTACCCTATCTGTTTCTAATACCCTTCTTTGCTATG
	pGreen II 0800-AOX1a-LUC-F	TTCCTGCAGCCCGGGGGATCCATCTGAAGAGCTTCTAGCTTTGT
	pGreen II 0800-AOX1a-LUC-R	CGCTCTAGAACTAGTGGATCCTGTTTCAAATCGGAAAAAGTGAAATC
	pGBKT7-RCD1-F	ATGGAGGCCGAATTC ATGGAAGCCAAGATCGTCAAGGTG
	pGBKT7-RCD1-R	ATGCGGCCGCTGCAG CAATCCACCTGCACCTTCTTCATG
	pGADT7-ANAC017-F	GAGGCCAGTGAATTC ATGGCGGATTCTTCACCCGAT
	pGADT7-ANAC017-R	GAGCTCGATGGATCC GTCTTTCAAGAGAAGACTTCTACCTGAG
